# Supplementary material for: Genome-wide analysis of DNA methylation in 106 schizophrenia family trios in Han Chinese
Source: PubMed Central journal article supplement — eBioMedicine. 2021 Oct 7;72:103609. doi: 10.1016/j.ebiom.2021.103609 (PMC8511801; doi:10.1016/j.ebiom.2021.103609), 2021-10-07
Supplement: mmc2.pdf [file mmc2.pdf]

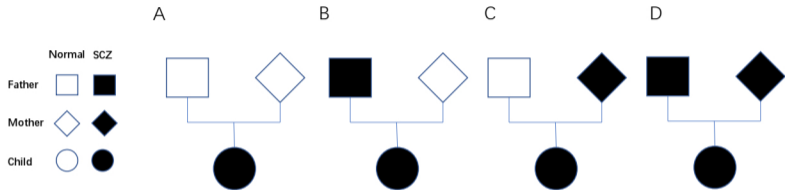

| Fitting model                         | A     | B     | C     | D      |
|---------------------------------------|-------|-------|-------|--------|
| Hypermethylation<br>As disease status | -1-11 | 1-11  | -111  | 111    |
| Hypomethylation<br>As disease status  | 11-1  | -11-1 | 1-1-1 | -1-1-1 |
