# Supplementary figures and images for: Genome-wide analysis of DNA methylation in 106 schizophrenia family trios in Han Chinese
Source: PubMed Central journal article supplement — eBioMedicine. 2021 Oct 7;72:103609. doi: 10.1016/j.ebiom.2021.103609 (PMC8511801; doi:10.1016/j.ebiom.2021.103609), 2021-10-07

A

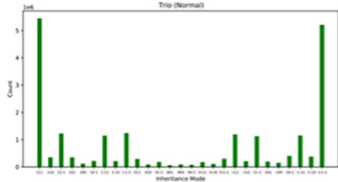

Total: 21732028  
 Omode: 3994874 (18.4%)  
 111,-1-1-1: 10654379 (49.0%)

| 111     | 110    | 11-1    | 101    | 100    | 10-1   | 1-11    | 1-10   | 1-1-1   |
|---------|--------|---------|--------|--------|--------|---------|--------|---------|
| 5445594 | 351703 | 1225123 | 352846 | 121971 | 219688 | 1147412 | 215290 | 1239071 |
| 011     | 010    | 01-1    | 001    | 000    | 00-1   | 0-11    | 0-10   | 0-1-1   |
| 292419  | 92020  | 182138  | 65042  | 91515  | 79064  | 177506  | 113290 | 299789  |
| -111    | -110   | -11-1   | -101   | -100   | -10-1  | -1-11   | -1-10  | -1-1-1  |
| 1193109 | 209067 | 1126995 | 198547 | 151898 | 403661 | 1151065 | 377420 | 5208785 |

B

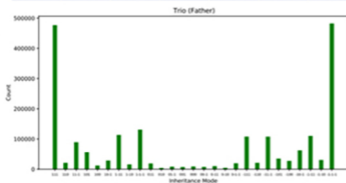

Total: 2021584  
 Omode: 402862 (19.9%)  
 111,-1-1-1: 959184 (47.4%)

| 111    | 110   | 11-1   | 101   | 100   | 10-1  | 1-11   | 1-10  | 1-1-1  |
|--------|-------|--------|-------|-------|-------|--------|-------|--------|
| 476774 | 21305 | 89231  | 56330 | 12387 | 28913 | 113508 | 15938 | 130995 |
| 011    | 010   | 01-1   | 001   | 000   | 00-1  | 0-11   | 0-10  | 0-1-1  |
| 19135  | 4144  | 8495   | 7311  | 9154  | 7786  | 10131  | 4687  | 19702  |
| -111   | -110  | -11-1  | -101  | -100  | -10-1 | -1-11  | -1-10 | -1-1-1 |
| 107900 | 21279 | 107722 | 35276 | 27790 | 62355 | 110182 | 30744 | 482410 |

C

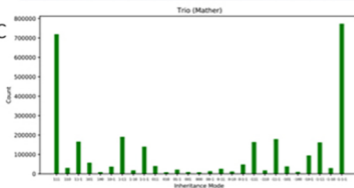

Total: 3032376  
 Omode: 535707 (17.7%)  
 111,-1-1-1: 1492971 (49.2%)

| 111    | 110   | 11-1   | 101   | 100   | 10-1  | 1-11   | 1-10  | 1-1-1  |
|--------|-------|--------|-------|-------|-------|--------|-------|--------|
| 719355 | 31110 | 166503 | 57941 | 9215  | 37756 | 191108 | 18013 | 140503 |
| 011    | 010   | 01-1   | 001   | 000   | 00-1  | 0-11   | 0-10  | 0-1-1  |
| 40549  | 8341  | 22149  | 9430  | 8049  | 13805 | 26239  | 12332 | 48738  |
| -111   | -110  | -11-1  | -101  | -100  | -10-1 | -1-11  | -1-10 | -1-1-1 |
| 164113 | 17821 | 179487 | 38802 | 10324 | 94808 | 161984 | 30285 | 773616 |

Supplement: mmc1.pdf [file mmc1.pdf]

**Normal Trio**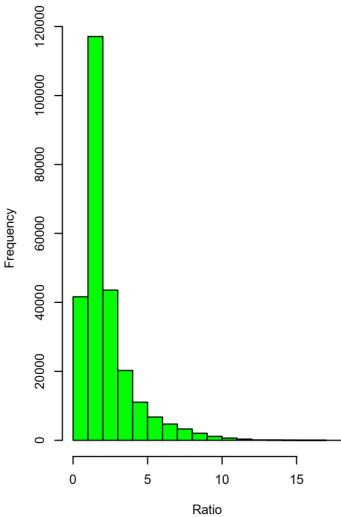**Father Trio**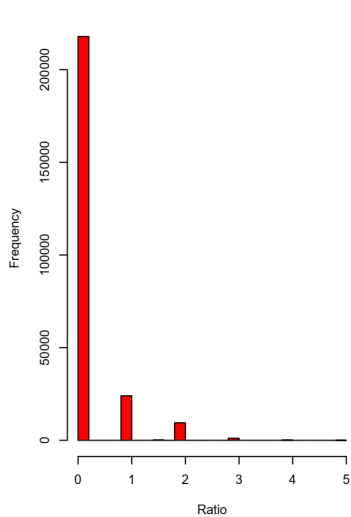**Mather Trio**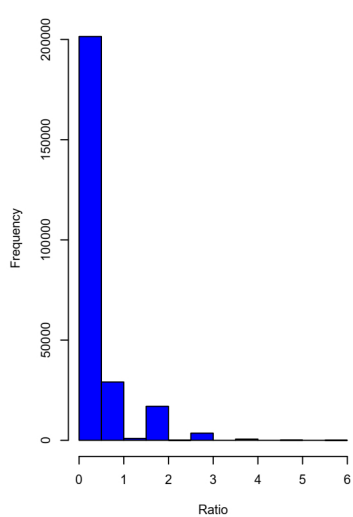

Supplement: mmc3.pdf [file mmc3.pdf]

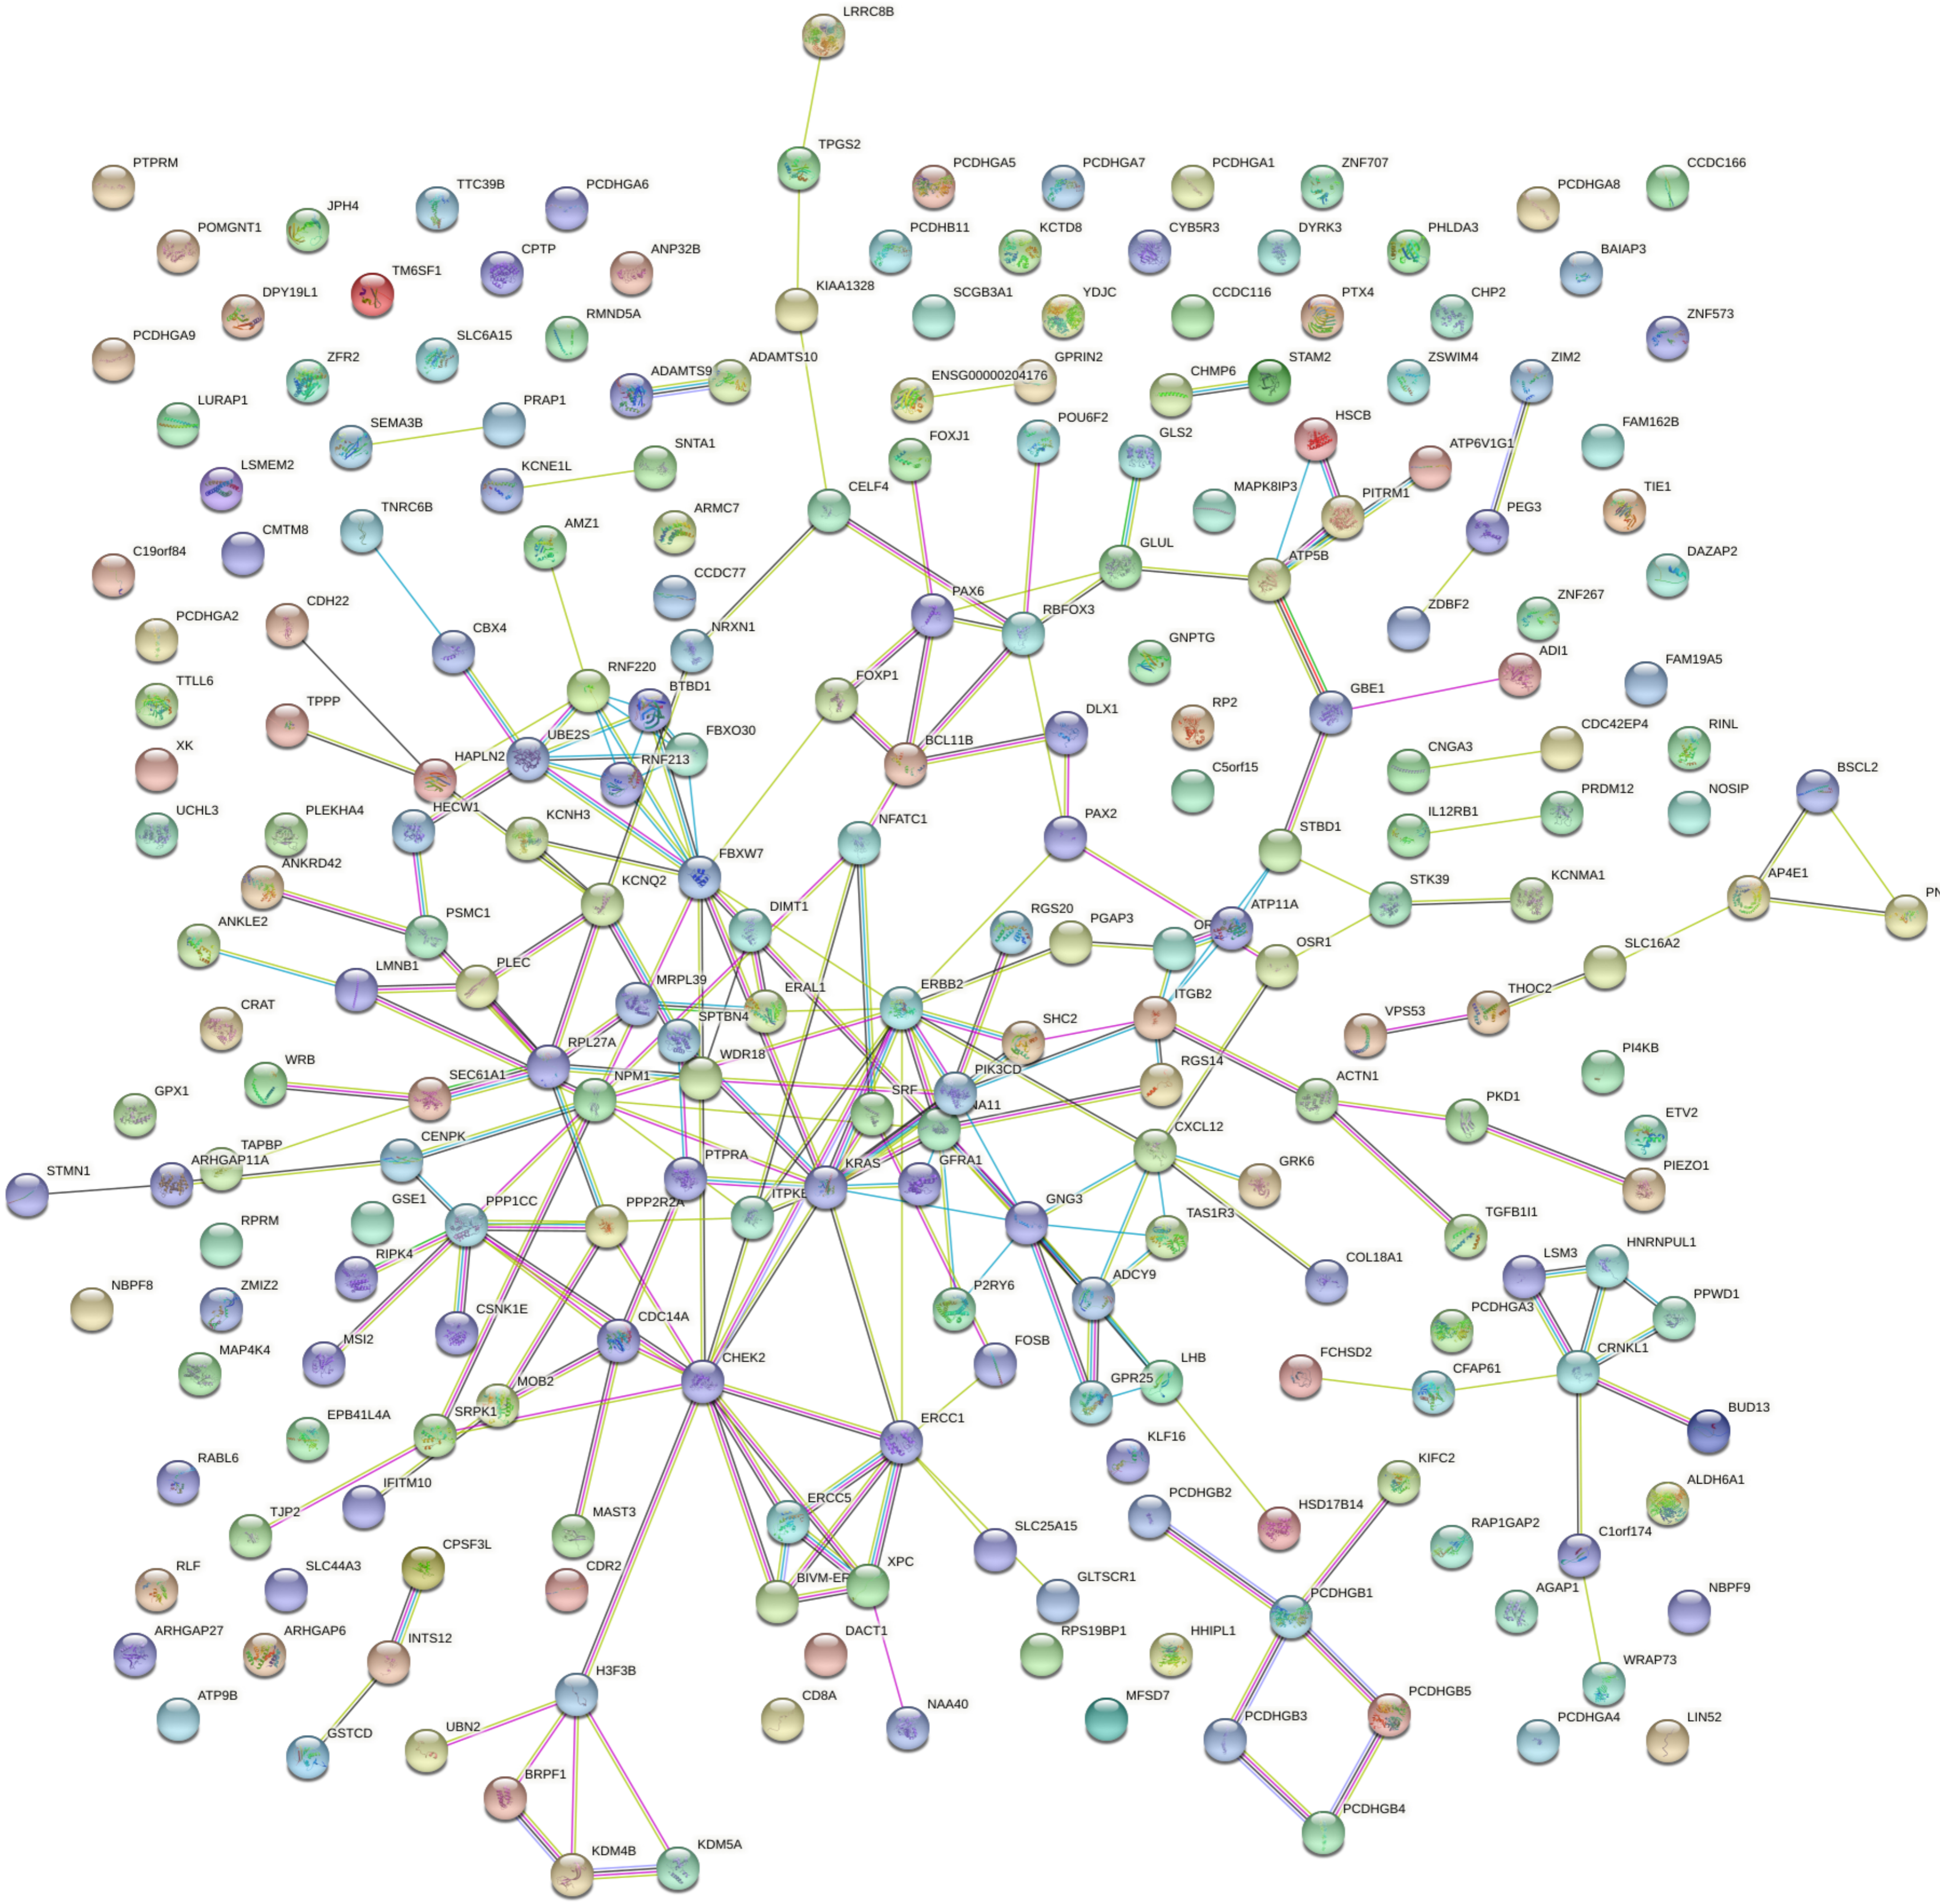

Supplement: mmc4.pdf [file mmc4.pdf]

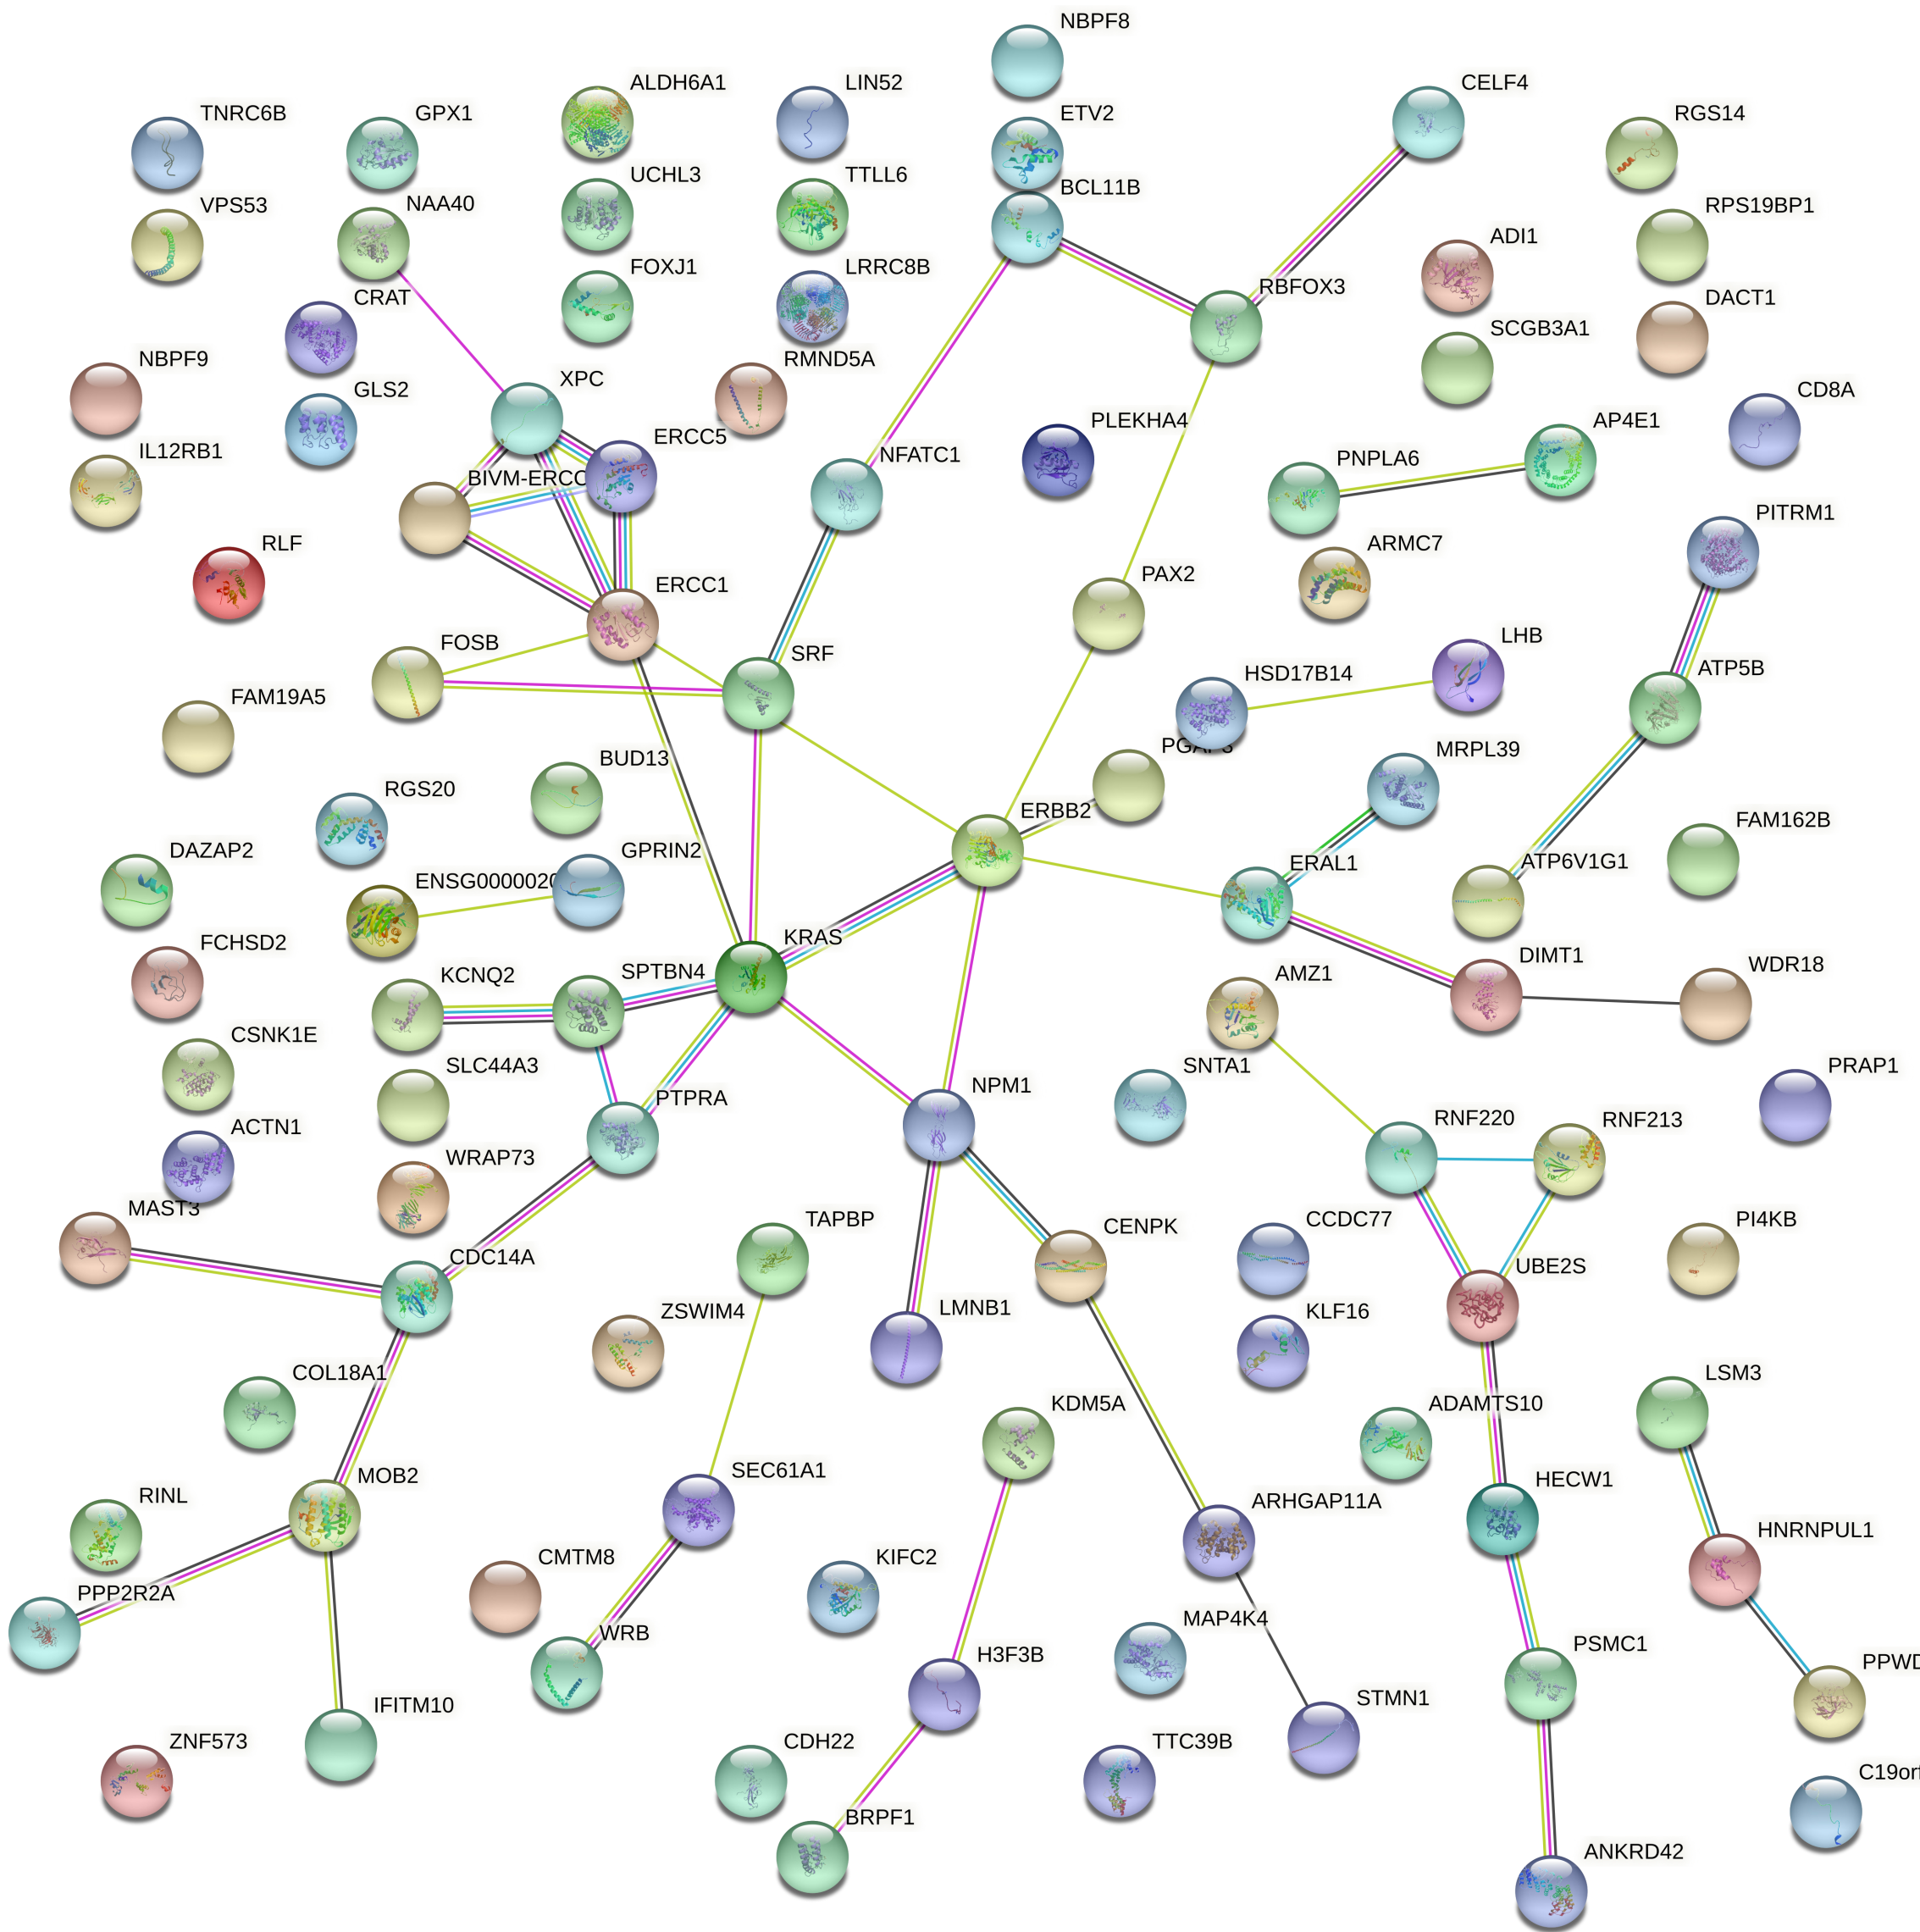

Supplement: mmc5.pdf [file mmc5.pdf]

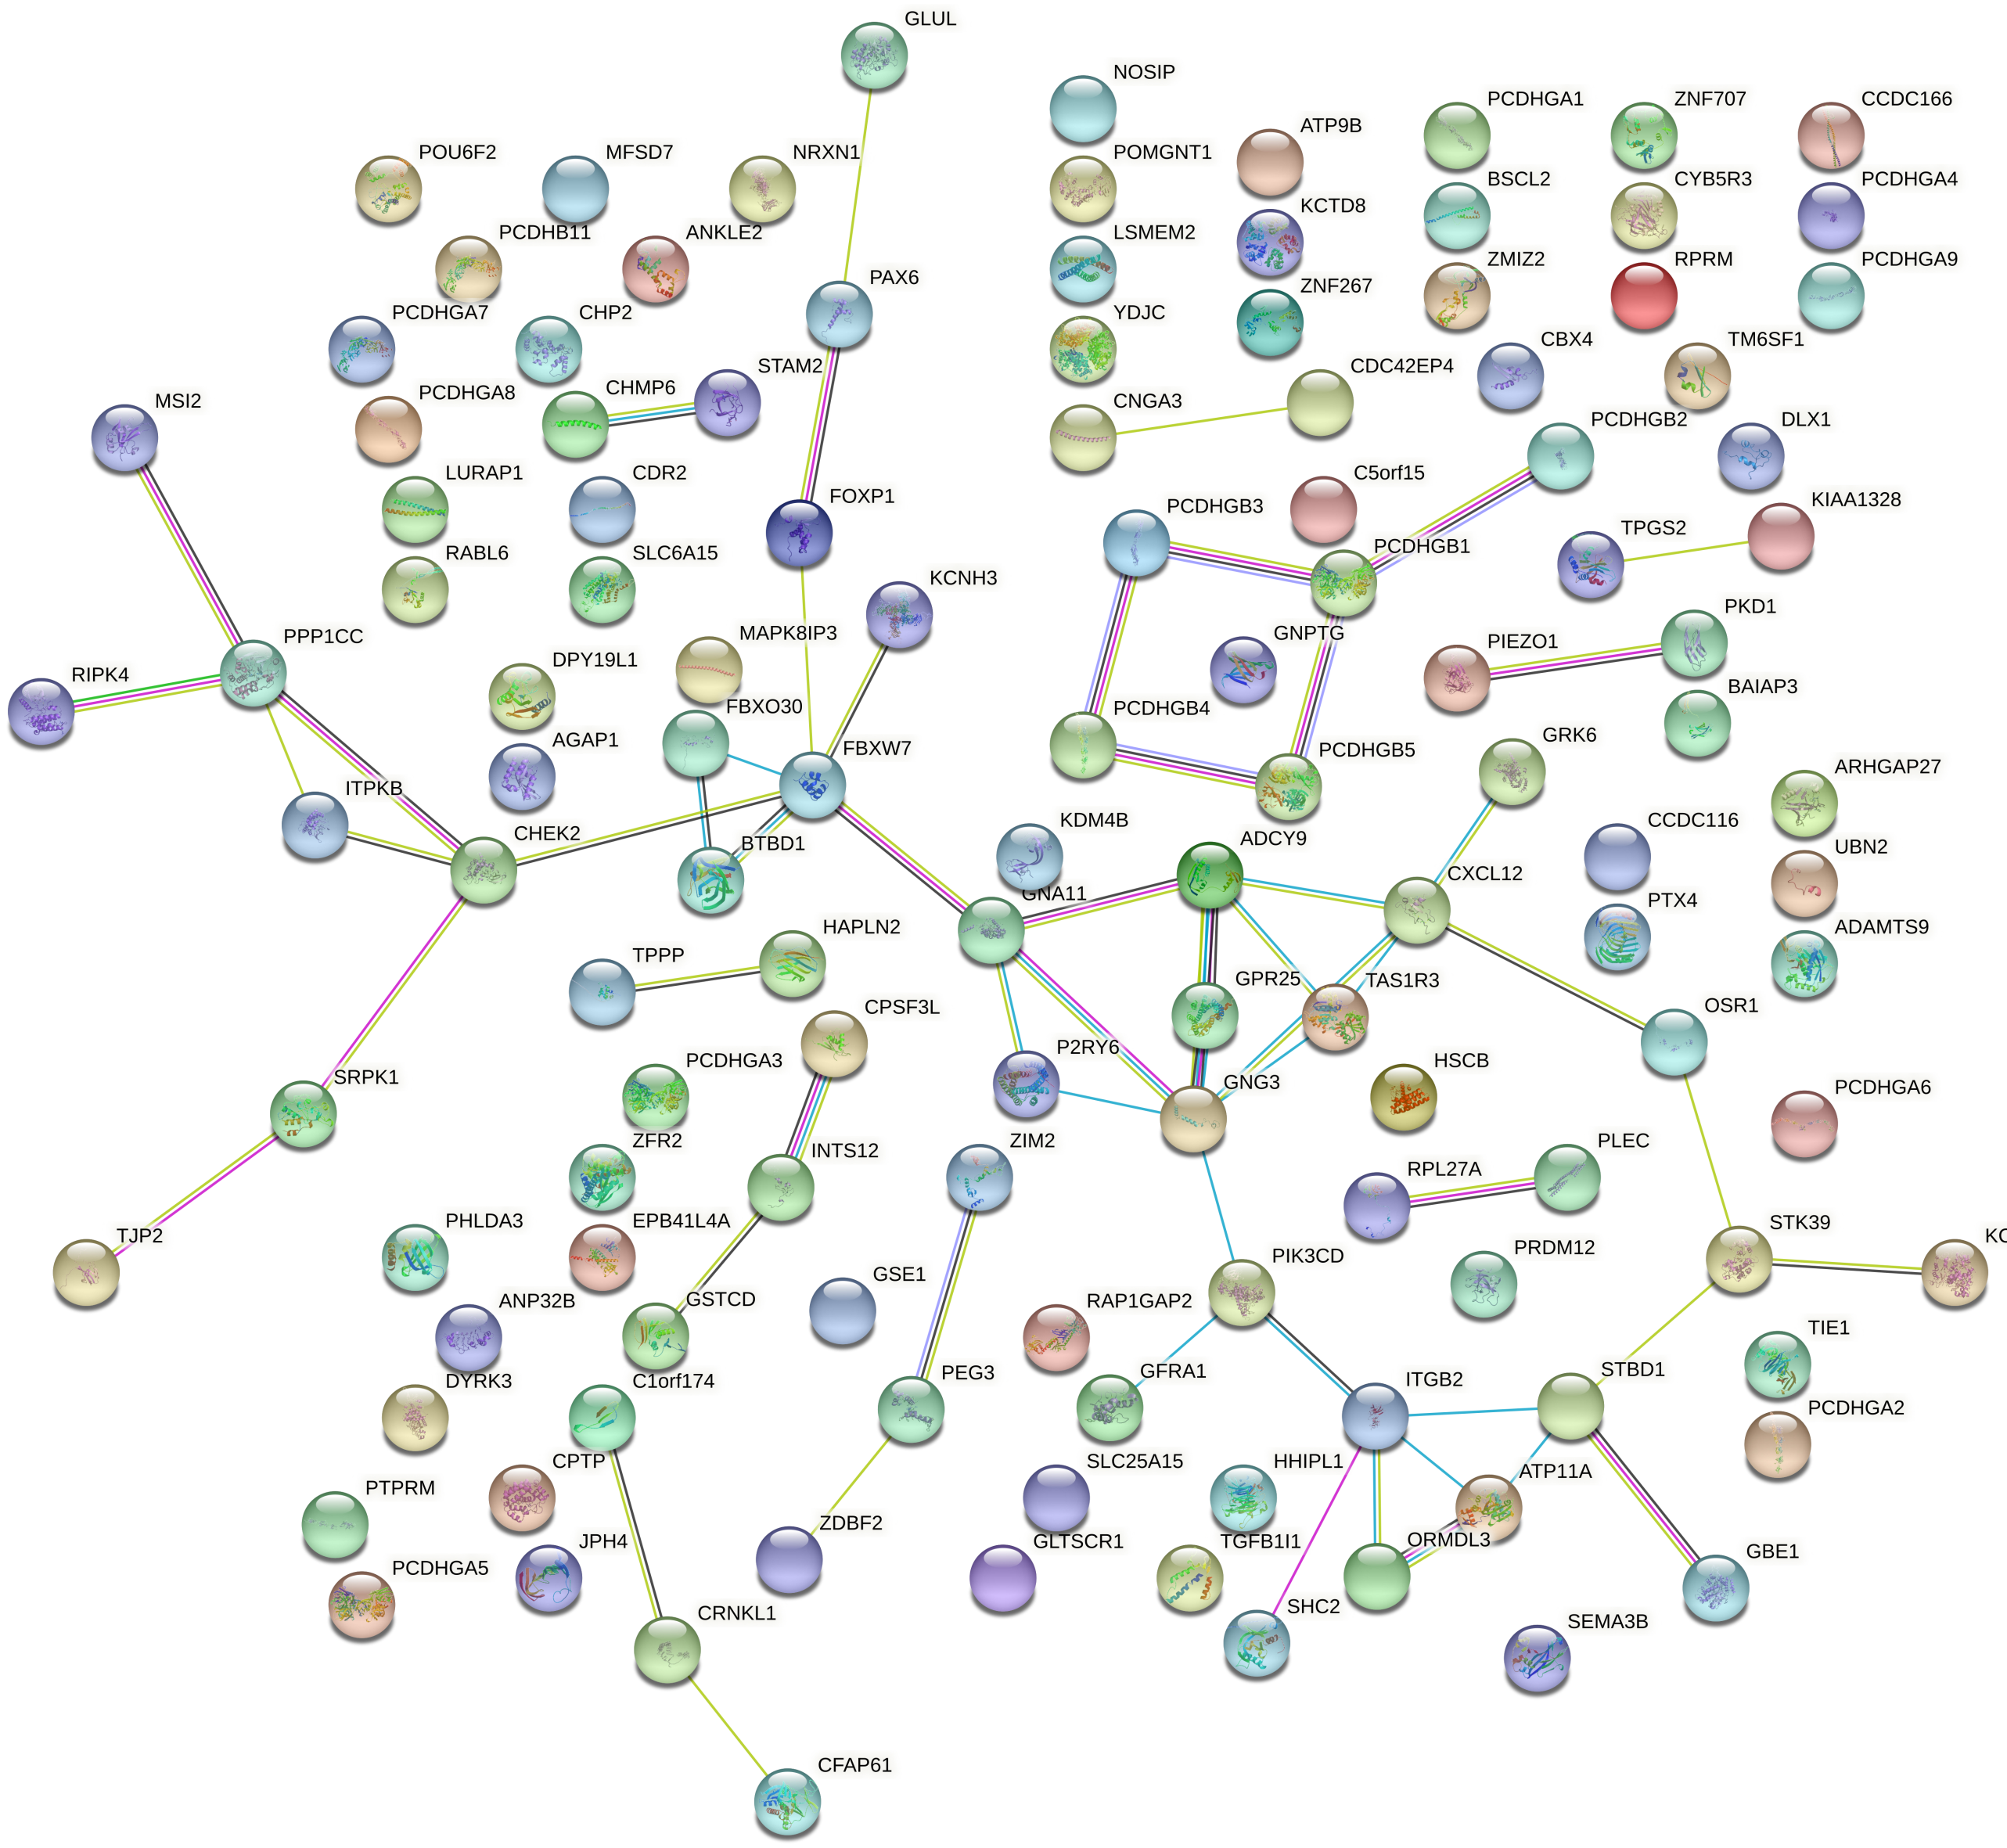

Supplement: mmc6.pdf [file mmc6.pdf]
